# Supplementary material for: Hepatotoxicity Induced by Sophora flavescens and Hepatic Accumulation of Kurarinone, a Major Hepatotoxic Constituent of Sophora flavescens in Rats
Source: PubMed Central journal article supplement (PMC6150336; doi:10.3390/molecules22111809), 2017-10-25
Supplement: molecules-22-01809-s001.pdf [file molecules-22-01809-s001.pdf]

**Supplementary Table S1.** Sequences of primers for RT-PCR

| Gene           |                | Sequences (5' to 3')    |
|----------------|----------------|-------------------------|
| CPT-1          | Forward primer | CCATAGTGCAGGAGCGTACAGT  |
|                | Reverse primer | CGAGTCCCGATGCCTTCAT     |
| CPT-2          | Forward primer | GCTCTCAAGGCTGGCATCAC    |
|                | Reverse primer | TGGAACTGAATGGAGTCAATGCT |
| PPAR- $\alpha$ | Forward primer | TACCTGTGAACACGATCTGA    |
|                | Reverse primer | GCTAGTCTTTCCTGCGAGTA    |
| LCAD           | Forward primer | GGCTGGTTAAGTGATCTCGTGAT |
|                | Reverse primer | TCTCCACCAAAAAGAGGCTAATG |
| $\beta$ -actin | Forward primer | GGCACCACACTTTCTACAAT    |
|                | Reverse primer | AGGTCTCAAACATGATCTGG    |

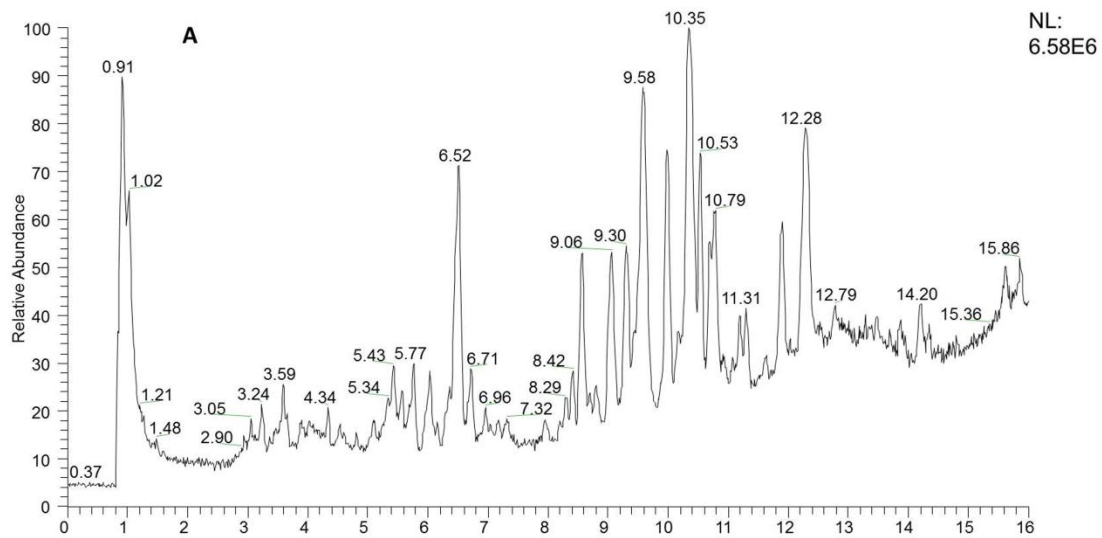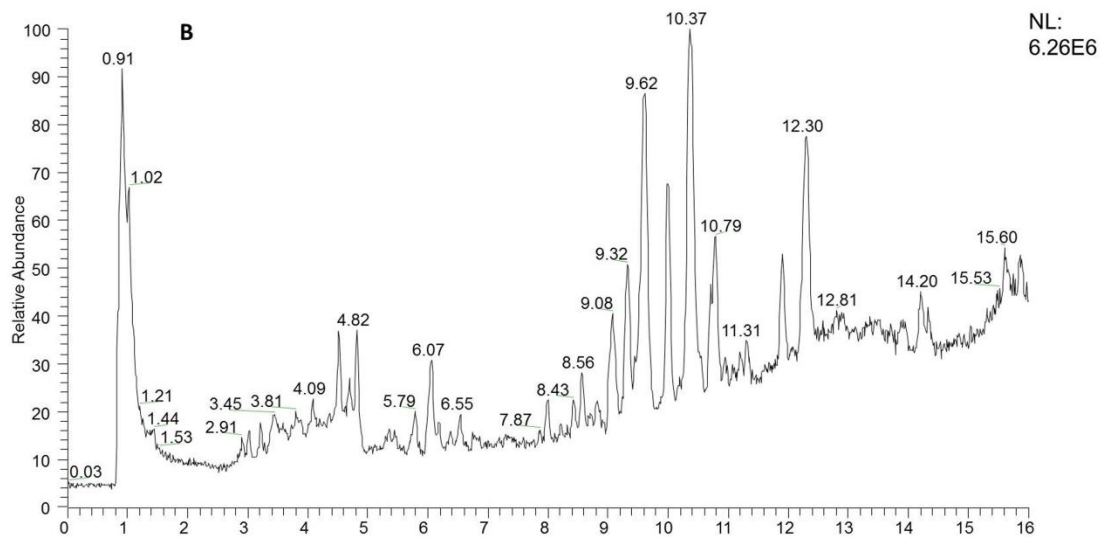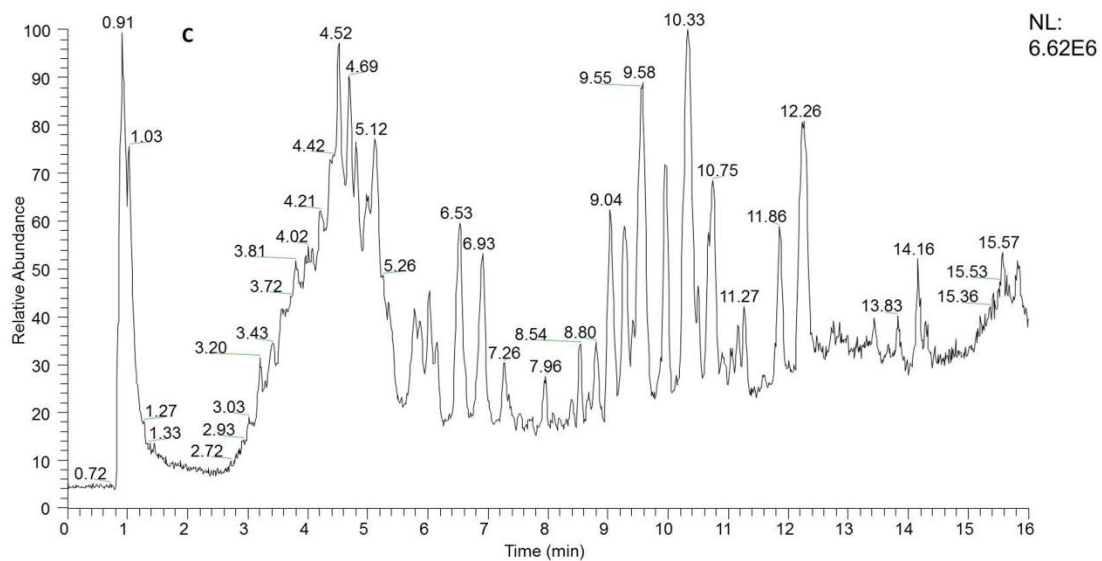

**Supplementary Figure S1.** Typical LC/MS total ion chromatogram (TIC) of the serum samples from (A) control, (B) ESF 1.25mg/kg and (C) ESF 2.5mg/kg groups under the negative ion mode (50–1000 m/z).

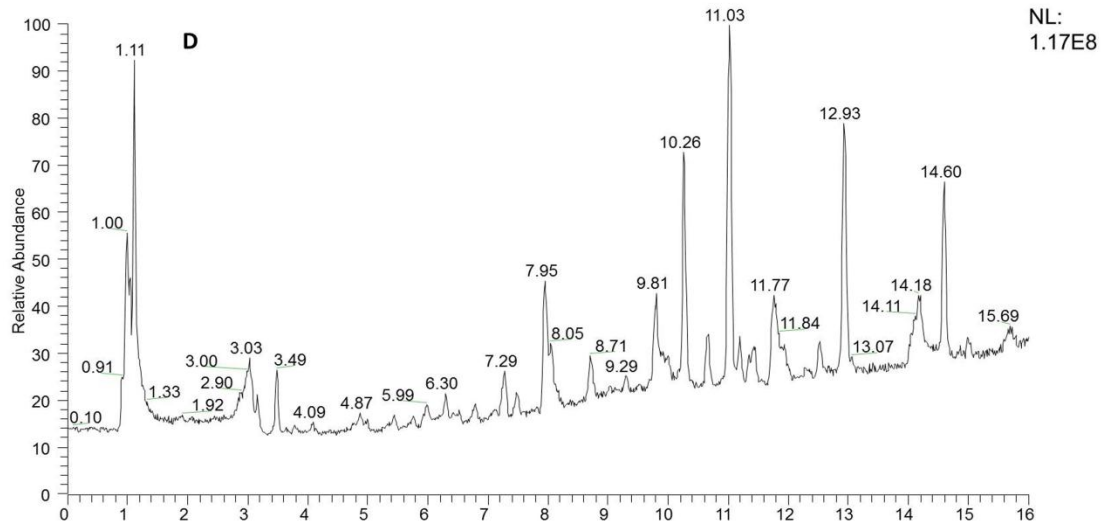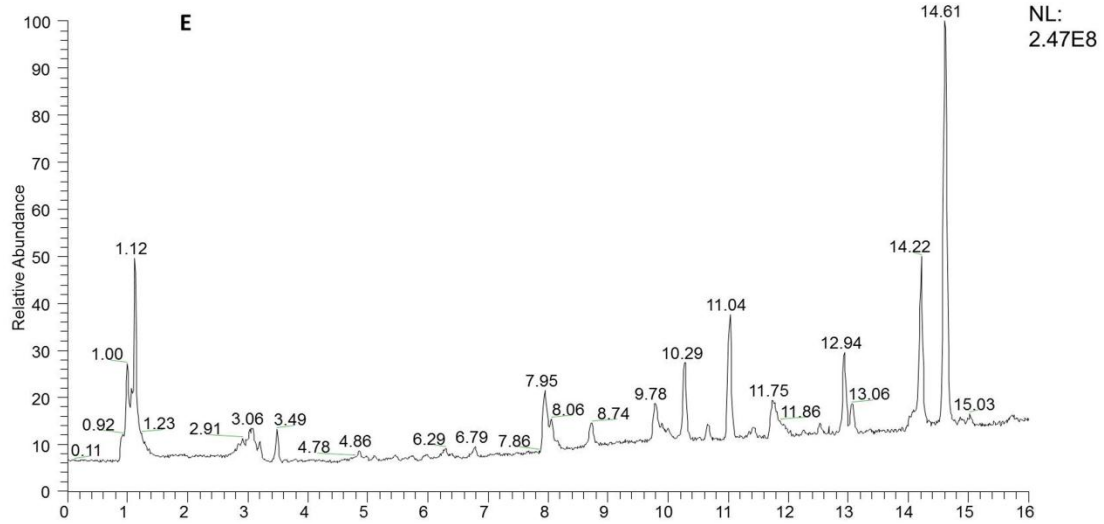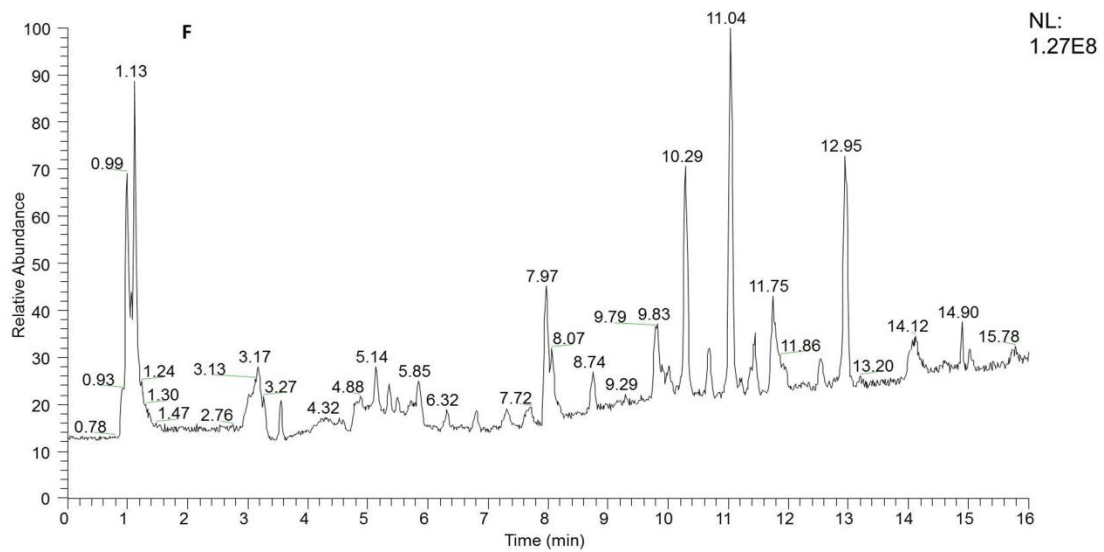

**Supplementary Figure S2.** Typical LC/MS total ion chromatogram (TIC) of the serum samples from (D) control, (E) ESF 1.25mg/kg and (F) ESF 2.5mg/kg groups under the positive ion mode (50–1000 m/z).
